## 1 **Directed evolution of *Anabaena variabilis* phenylalanine ammonia-lyase** 2 **(PAL) identifies mutants with enhanced activities**

3 Zachary JS Mays<sup>a†</sup>, Karishma Mohan<sup>a†</sup>, Vikas D Trivedi<sup>a</sup>, Todd C Chappell<sup>a</sup>, Nikhil U Nair<sup>\*a</sup>

4 <sup>a</sup> Department of Chemical & Biological Engineering, Tufts University, Medford, MA

5 <sup>†</sup> Equal contributions

6 <sup>\*</sup> corresponding author, [nikhil.nair@tufts.edu](mailto:nikhil.nair@tufts.edu), [@nair\\_lab](#)

7  
8 **There is broad interest in engineering phenylalanine ammonia-lyase (PAL) for its biocatalytic**  
9 **applications in industry (fine-chemicals and natural product synthesis) and medicine**  
10 **(phenylketoruria/PKU and cancer treatment). While site-specific mutagenesis has been**  
11 **employed to improve PAL stability or substrate specificity, a more comprehensive mutational**  
12 **landscape has yet to be explored for this class of enzymes. Here, we report development of a**  
13 **directed evolution technique to engineer PAL enzymes. Central to this approach is a high-**  
14 **throughput enrichment that couples *E. coli* growth to PAL activity. Using the clinically-relevant**  
15 **PAL from *Anabaena variabilis*, which is used on the formulation of pegvaliase for PKU therapy,**  
16 **we identified mutations at residues previously unknown as relevant for function that increase**  
17 **turnover frequency almost twofold after only a single round of engineering. This work**  
18 **demonstrates the power our technique for ammonia-lyase enzyme engineering.**

19 The ammonia lyase (AL; EC 4.3.1.x) class and aminomutase (AM; 5.4.3.x) class of  
20 enzymes have been the focus of decades of research and development for industrial and  
21 biomedical applications. Their prosthetic group, 4-methylideneimidazole-5-one (MIO), either  
22 catalyzes the transformation of an L- $\alpha$ -amino acid into the  $\alpha,\beta$ -unsaturated carboxylic acid  
23 counterpart via the non-oxidative elimination of ammonia or into the spatially isometric  $\beta$ -amino  
24 acid via a 2 $\rightarrow$ 3 amine shift, respectively (Cooke et al., 2009). Accordingly, optically pure amino  
25 acids can be biosynthesized from the reverse reactions (D’Cunha et al., 1996; Shetty et al.,  
26 1986; Yamada et al., 1981), and the application of MIO-enzymes in both directions has yielded  
27 intermediates for pharmaceuticals (Lee et al., 2015; Walker et al., 2004), agrochemicals (An  
28 et al., 2007; Hoagland, 1996; Shin et al., 2012), polymers (McKenna and Nielsen, 2011;  
29 Verhoef et al., 2009, 2007), and flavonoids (Jiang et al., 2005; Lee et al., 2015; Park et al.,  
30 2012; Wu et al., 2013).

31 Phenylalanine ammonia lyase (PAL) has been of great interest as a treatment for the  
32 genetic disease phenylketonuria (PKU). Daily subcutaneous injection of a purified and  
33 PEGylated recombinant PAL from *Anabaena variabilis* (PEG-rAvPAL; Palynziq®, BioMarin  
34 Pharmaceutical Inc.) was approved by the US FDA in 2018 as an enzyme substitution therapy

35 for PKU (Hydery and Coppentrath, 2019). Concurrently, an orally administered engineered  
36 probiotic *Escherichia coli* Nissle 1917 expressing recombinant PAL from *Photorhabdus*  
37 *luminescens* is currently under investigation by Synlogic Inc (Isabella et al., 2018). Other  
38 formulations of this enzyme are also being explored as therapeutics (Abell and Stith, 1973;  
39 Babich et al., 2013; Chang et al., 1995; Durrer et al., 2017; Rossi et al., 2014; Yang et al.,  
40 2019) as well as for the production of low phenylalanine (phe) protein dietary supplementation  
41 for PKU (Castañeda et al., 2015) and cancer (Kakkis et al., 2009; Shen et al., 1977) patients.

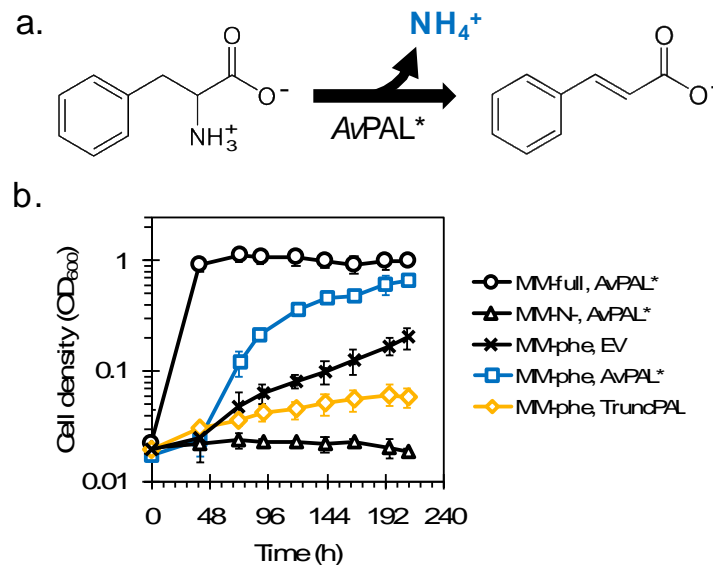

42  
43 **Figure 1.** Initial study demonstrating growth-rescue of *E. coli* by PAL activity. (a.) Growth rescue relies on  
44 deamination of phenylalanine by PAL to form ammonium (NH<sub>4</sub><sup>+</sup>), a preferred nitrogen source for *E. coli*. (b.) *E.*  
45 *coli* cells expressing active AvPAL\* (□) in MM<sup>phe,init</sup> grow faster than wild-type cells (×) or those expressing  
46 truncated inactive AvPAL\* (◇). Cells grown in MM<sup>full,init</sup> (○) and MM<sup>N,init</sup> (△) as controls.

47 This significant interest has resulted in various efforts to improve enzyme properties.  
48 Structural and sequence homology between aromatic ALs and AMs has fuelled rational  
49 engineering efforts to alter or improve stability (Bell et al., 2017; Chesters et al., 2012; Wang  
50 et al., 2008; Zhang et al., 2017), substrate specificity (Bartsch et al., 2013; Louie et al., 2006;  
51 Lovelock and Turner, 2014; Xiang and Moore, 2005), and enantioselectivity (Turner, 2011;  
52 Wohlgemuth, 2010; Wu et al., 2009). However, application of combinatorial approaches that  
53 leverage evolutionary selection to search large sequence spaces for improved properties  
54 (Wrenbeck et al., 2017) has not been well-explored for this class of enzymes (Flachbart et al.,  
55 2019). Here, we developed a growth-based high-throughput enrichment scheme and  
56 screened a mutagenized PAL library to identify variants with improved kinetic properties. Core  
57 to this enrichment is the growth rescue of *E. coli* by PAL in minimal medium with phe, which  
58 cannot be used as the sole nitrogen source by K-12 strains (Reitzer, 1996). Consequently, *E.*  
59 *coli* can only grow if PAL actively deaminates phe to release ammonium, a highly preferred

60 nitrogen-source (Figure 1a). We executed our directed evolution technique using the *A.*  
 61 *variabilis* PAL (DM-rAvPAL/AvPAL\*) (Kang et al., 2010; Sarkissian et al., 2008), because of  
 62 its clinical significance, and identified mutants with improved catalytic properties. The  
 63 mutations identified here have not been previously reported as important for PAL catalytic  
 64 activity, demonstrating the advantage of our approach for scanning unexplored sequence  
 65 space over previous efforts.

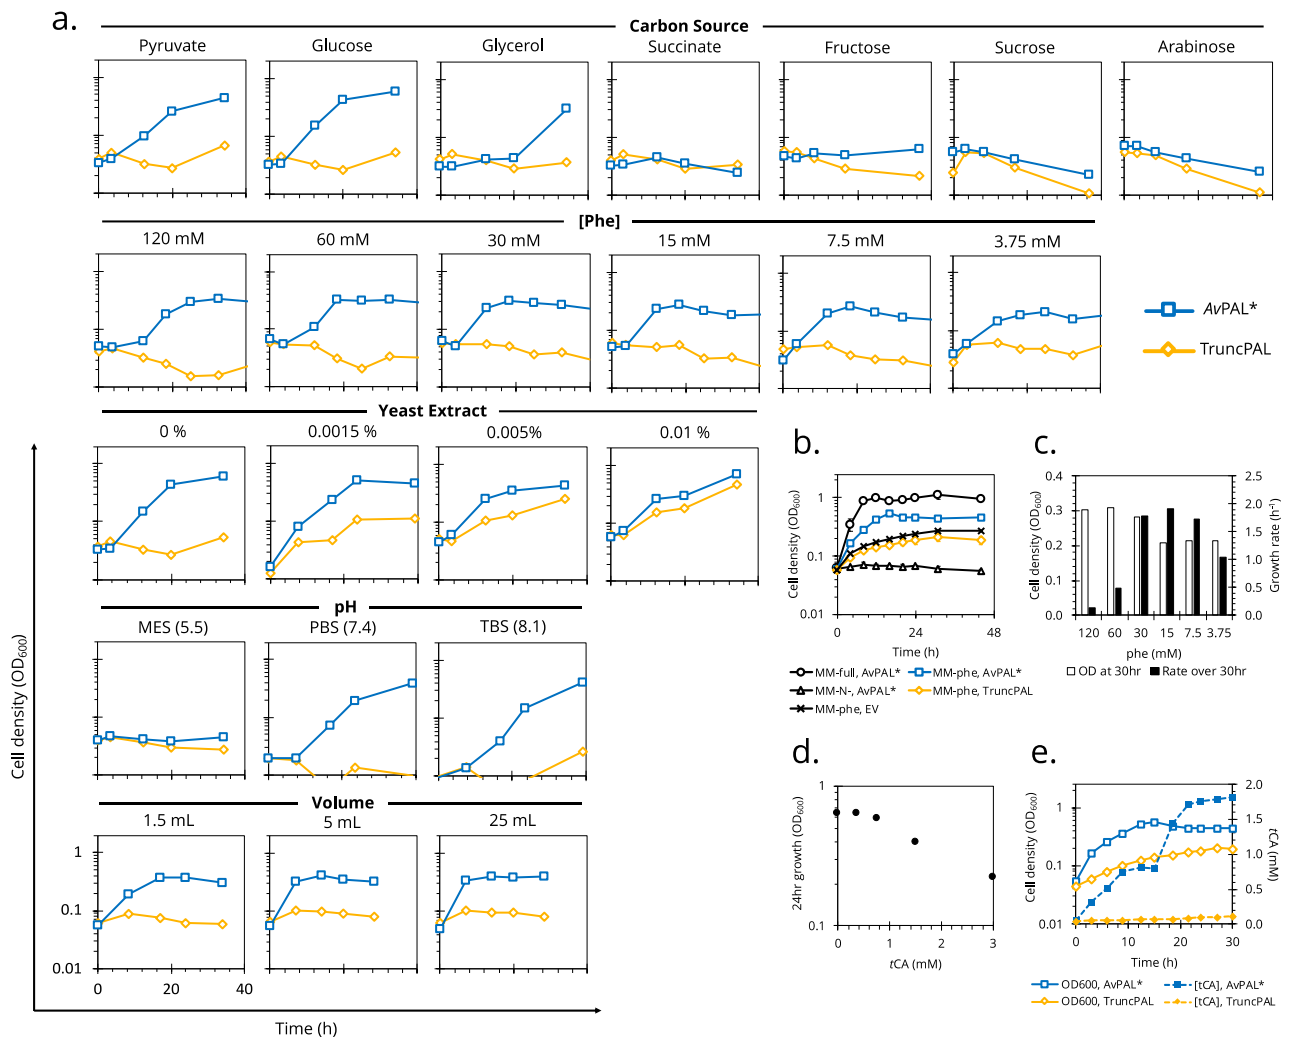

66  
 67 **Figure 2.** Optimizing conditions of growth-based PAL selection. (a.) *E. coli* MG1655(DE3) $\Delta$ endA, $\Delta$ recA cells  
 68 expressing AvPAL\* (blue) or truncated AvPAL\* (orange) were tested for growth in MM<sup>phe</sup> under different  
 69 conditions. (b.) The final optimized conditions allowed for growth to be recovered in 12 h compared to 3 d  
 70 previously. (c.) While optimizing the growth media, we observed that at phe concentrations > 30 mM, final  
 71 biomass density decreased and lag time increased, suggesting toxicity due to rapid accumulation of tCA. At  
 72 phe concentrations < 30 mM, final biomass densities dropped, and at concentrations  $\leq$  7.5 mM, growth rate was  
 73 also slowed, suggesting insufficient nitrogen to sustain growth. (d.) Media supplemented with tCA inhibited the  
 74 growth of *E. coli* at concentrations  $\geq$  1 mM. (e.) AvPAL\* expressing cells produce and secrete tCA to  $\sim$  1 mM  
 75 tCA before arresting growth. Subsequent bolus increase in tCA during death phase is likely due to cell lysis. All  
 76 curves representative of duplicates with less than 10% error.

77 Initial growth studies demonstrated that *AvPAL\** could rescue growth of *E. coli* in phe  
78 selective minimal media ( $MM^{phe,init}$ ) with a ~70% biomass yield relative to complete minimal  
79 media ( $MM^{full,init}$ ), demonstrating coupling between growth to enzyme activity (Figure 1b).  
80 However, controls strains had unexpected, albeit slow, growth. Overexpression of noncatalytic  
81 proteins such as green fluorescent protein (sfGFP) or a truncated *AvPAL\** (TruncPAL)  
82 decreased background growth (Figure 1b) but still adversely affected the dynamic range to  
83 reliably select for highly active PAL over inactive mutants or other suppressors, if left  
84 unoptimized. Phenylalanine metabolism under austere conditions, *viz* nitrogen starvation, has  
85 not been well studied, and transaminases (AspC, IlvE, TyrB, HisC) may have unreported  
86 promiscuous activity on phe (Gelfand and Steinberg, 1977; Guzmán et al., 2015).  
87 Unfortunately, we observed no difference in the basal growth of *E. coli* in  $MM^{phe,init}$  after  
88 deleting each transaminase (Figure S1) suggesting no single gene was responsible for basal  
89 growth.

90 As an alternative approach to minimize accumulation of false positives, we optimized  
91 conditions to increase biomass yield and shorten the lag. We tested different media  
92 formulations (carbon source, pH, strain background, culture volume, phe concentration, and  
93 the presence of an additional nitrogen source) to achieve this goal (Figure 2a). We initially  
94 performed this optimization using MG1655, which grows poorly in minimal media because of  
95 inefficient pyrimidine utilization from a mutation in *rph* (Jensen, 1993). Switching to a strain  
96 with a corrected allele (MG1655<sup>rph+</sup>) shortened the lag phase by 18 h and culturing in glucose  
97 reduced the lag phase by another 24 h (Figure 2b).

98 We found that not only was phe concentration important for optimal growth (Figure 2a,c),  
99 but that *trans*-cinnamic acid (*tCA*) was toxic to cells. Cells grown in  $MM^{full,opt}$  showed impaired  
100 growth when supplemented with 1.5 mM *tCA* (Figure 2c). When grown in  $MM^{phe,opt}$  containing  
101 <30 mM phe, growth rate and biomass yield were reduced by low nitrogen availability.  
102 However, at phe >30 mM, *tCA* accumulated too quickly causing toxicity, and the cells not only  
103 experience a long lag but also quickly arrest growth (Figure 2c-e). The final optimized  
104 conditions in Figure 2e show that despite growth levelling out at OD<sub>600</sub> 0.3, the lag was virtually  
105 eliminated. Thus, we determined that subculturing the cells into fresh medium at OD<sub>600</sub> 0.2  
106 would minimize *tCA* toxicity and basal growth—maximizing the difference between inactive  
107 and active PAL expressing cells. To validate enrichment occurs under these conditions, we  
108 created a mock library by transforming a 1:10 or 1:1000 mixture of *AvPAL\**-to-sfGFP-  
109 expressing. We measured cell fluorescence by flow-cytometry and observed decreasing  
110 fluorescence and increasing PAL activity at successive rounds of subculture in  $MM^{phe,opt}$   
111 (Figure S2).

112 After finalizing the conditions to enrich active PAL, we created a mutant library of 10<sup>5</sup>  
113 variants with an average error rate of 2.8 aa/protein. The entire library was grown in  $MM^{phe,opt}$

114 over three rounds, subculturing each time at OD<sub>600</sub> of 0.2 (Figure 3a). We subsequently plated  
115 the cells on non-selective LB medium, picked five random colonies and screened their lysates  
116 for PAL activity. Two of the five, viz M222L and L4P/G218S, showed nearly twofold higher  
117 activity with the other three showing similar activity to parental AvPAL\* (Figure 3b). This result  
118 suggests successful enrichment of higher activity mutants over lower/inactive mutants. *E. coli*  
119 expressing M222L and L4P/G218S mutants showed faster growth compared to AvPAL\* in  
120 MM<sup>phe,opt</sup>, with all attaining the same OD<sub>600</sub> at stationary phase (Figure 3c). The greater  
121 differences in growth profiles at early growth stages between mutants (M222L and  
122 L4P/G218S) and parental AvPAL\* is consistent with the enrichment strategy of subculturing  
123 at low OD<sub>600</sub>. Furthermore, residues 218 and 222 are directly adjacent to the active site of  
124 AvPAL\* and in close vicinity of the MIO-adduct (Wang et al., 2008). Comparing the crystal  
125 structure of AvPAL\* to these mutants shows potential changes in hydrogen bonding within the  
126 active site (Figure S3).

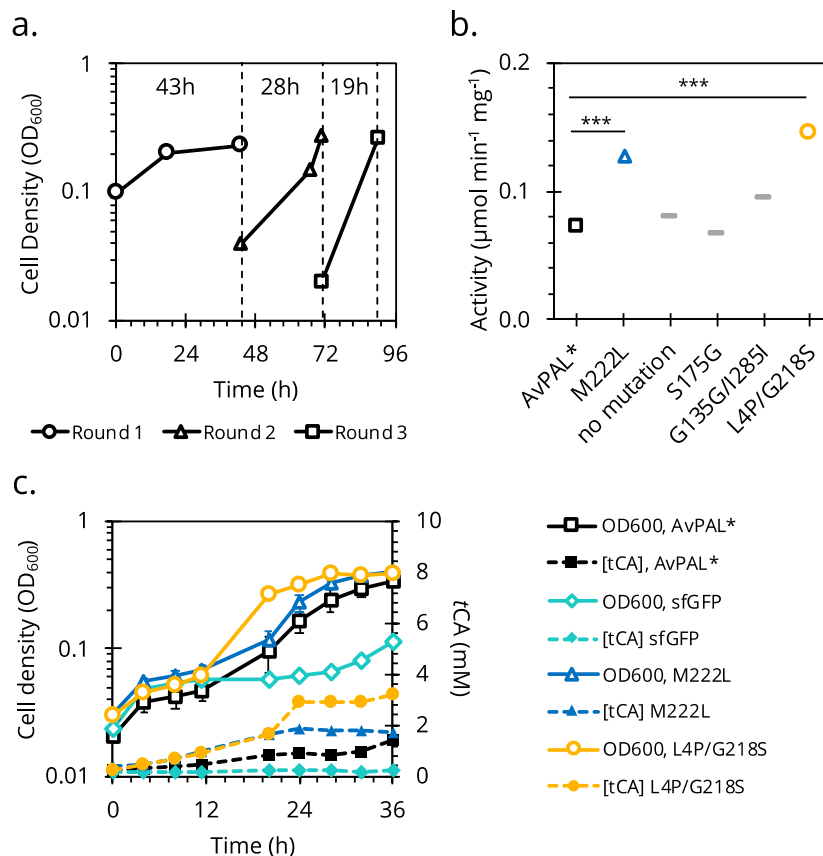

127  
128 **Figure 3.** Identification of AvPAL\* mutants by growth-coupled enrichment. (a.) The growth profiles of *E. coli*  
129 MG1655<sup>pht+</sup> cells expressing the AvPAL\* mutant library grown in MM<sup>phe,opt</sup> over three rounds. (b.) PAL activity  
130 in lysate of 5 randomly picked colonies normalized to total protein. (c.) The growth profiles (solid) and tCA  
131 production (dotted) in MM<sup>phe,opt</sup> of mutants showing higher than parental activity.

132 Previous studies with AvPAL\* have demonstrated that kinetic parameters, pH optimum,  
 133 thermal and proteolytic stabilities are relevant to therapeutic efficacy for PKU enzyme-  
 134 replacement therapy. The  $k_{cat}$  of both the mutants was 70 – 80% higher than parental AvPAL\*  
 135 (Figure 4a) whereas the  $K_M$  of M222L was similar to that of the parent and that of L4P/G218S  
 136 was  $\sim 2.5\times$  higher. Overall, the M222L mutant showed improved catalytic efficiency compared  
 137 to AvPAL\*, while L4P/G218S mutant showed a trade-off between turnover frequency and  
 138 substrate “affinity”. AvPAL\* is reported to have a pH optimum in the range of 7.5 – 8.5 (Wang  
 139 et al., 2008) and we observed similar results for both the mutants (Figure 4b), albeit with a  
 140 slightly narrower optimal range. Temperature stability was assessed by subjecting the mutants  
 141 to different temperatures for 1 h before measuring enzyme activity at optimal conditions (37  
 142 °C, pH 7.4). The enzymes remained stable from 37 °C to 55 °C and began a modest decrease  
 143 in relative activity at 65 °C before denaturing at 80 °C (Figure 4c). The proteolytic stability was  
 144 evaluated by incubating purified enzymes to trypsin. M222L was as trypsin-resistant as  
 145 AvPAL\* but L4P/G218S showed rapid loss of activity within five minutes (Figure 4d).

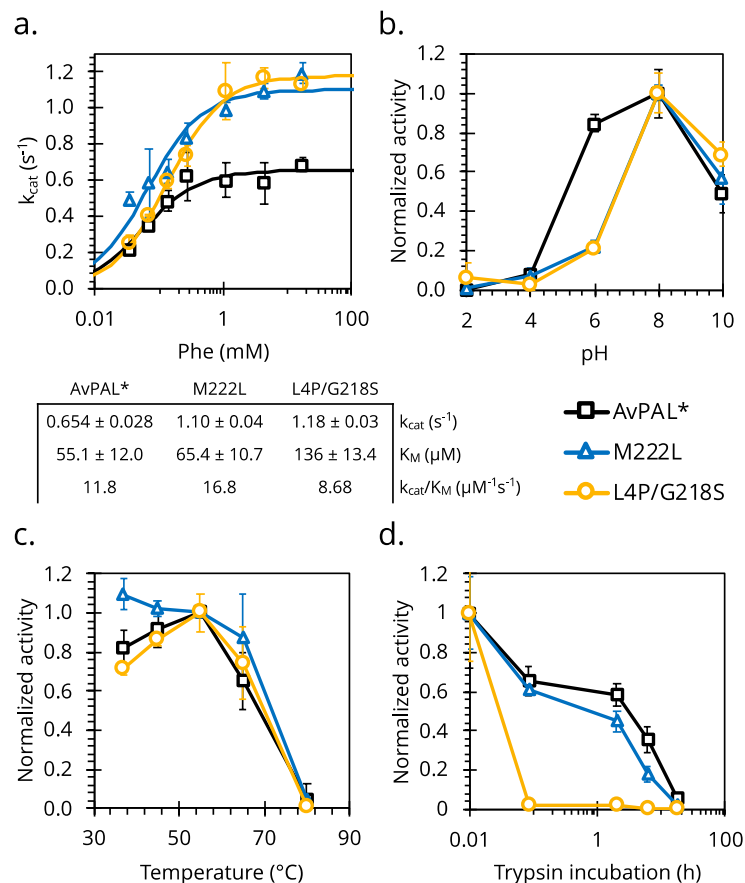

146

147 **Figure 4.** Biochemical characterization of PAL mutants. Two mutants showing higher than wildtype activity were  
 148 characterized to establish (a.) kinetic parameters, (b.) pH optimum, (c.) temperature optimum, (d.) and  
 149 resistance to protease degradation.

150 Our results show that the catalytic properties of this class of enzymes, which are important  
151 for both industrial and biomedical applications, can be engineered using directed evolution.  
152 Further, the large sequence space we rapidly searched to identify mutations at residues  
153 previously unrecognized as functionally important, serves as evidence of this technique's  
154 strength. Since deamination activity serves as the foundation of technique, we offer this  
155 method as demonstration that may be applicable to other ammonia lyases as well. The  
156 improvements in turnover rates observed here are unprecedented in the literature, either  
157 through rational or combinatorial methods, and has tremendous translation potential,  
158 especially for PKU.

## 159 **Material & Methods**

### 160 **Microbial strains, plasmids, and growth conditions**

161 All *Escherichia coli* strains were cultured in lysogeny broth (LB) (VWR International, Randor, PA)  
162 at 37 °C with rotary shaking at 250 rpm. All media was solidified using 1.5 % (w/v) agar (Teknova Inc,  
163 Hollister, CA). Minimal media (MM) conditions are described in the "Optimization of growth-coupled  
164 enrichment" section below. *E. coli* DH5 $\alpha$  was used as a host for the construction of the expression  
165 vectors and cultured as above only supplemented with chloramphenicol (25  $\mu$ g/mL) (RPI Corp). Initial  
166 expression in MM was performed in *E. coli* MG1655(DE3) <sup>$\Delta$ endA, $\Delta$ recA</sup> and later moved to *E. coli*  
167 MG1655<sup>roph+</sup> for final experiments.

168 All cloning was performed in *E. coli* DH5 $\alpha$  with reagents from New England Biolabs, Inc (Ipswich,  
169 MA). Preliminary expression experiments were conducted using the inducible pACYC-  
170 Duet1\_AvPAL\*, constructed by using the surrounding sites for restriction endonucleases NcoI and  
171 XhoI. For subsequent experiments requiring constitutive expression, the plasmid pBAV1k was  
172 implemented, with the gene of interest was replaced with AvPAL\* using Gibson assembly.

### 173 **Enzyme activity assays**

174 The activity of all AvPAL constructs was measured by production of tCA over time. Cultures were  
175 sonicated on ice using a Sonifier SFX 150 (Branson Ultrasonics, Danbury, CT) (2 s on; 10 s off; 4  
176 min; 55%), and debris was separated from the lysate by centrifuging at 10,000  $\times$  g for 10 min. Ten  
177 microliters of lysate were then mixed with 190  $\mu$ L of pre-warmed 50 mM phe (Tokyo Chemical  
178 Industry, Portland, OR) in phosphate buffered saline (PBS) (137 mM NaCl, 2.7 mM KCl, 10 mM  
179 Na<sub>2</sub>HPO<sub>4</sub>, 2 mM KH<sub>2</sub>PO<sub>4</sub>, pH 7.4) in a 96-well F-bottom UVStar (Greiner Bio-One, Kremsmünster,

180 Austria) microtiter plate. Absorbance at 290nm was measured every 30 s at 37°C using a SpectraMax  
181 M3 (Molecular Devices) plate reader.

182 Each construct included a N-term His-tag used for immobilized metal affinity chromatography  
183 (IMAC) purification. Briefly, overnight cell cultures were sonicated in 3 mL Equilibration buffer (300  
184 mM NaCl, 50 mM NaH<sub>2</sub>PO<sub>4</sub>, 10 mM imidazole, 15% (w/v) glycerol, pH 8.0). The lysate was loaded  
185 onto a prepared column with 2 mL TALON Metal Affinity Resin (Clontech Laboratories, Inc., Mountain  
186 View, CA). After being washed twice with 5 column volumes (CV) of Equilibration buffer, pure protein  
187 was then eluted off the column with 2.5 mL of Elution buffer (300 mM NaCl, 50 mM NaH<sub>2</sub>PO<sub>4</sub>, 500  
188 mM imidazole, 15% (w/v) glycerol, pH 8.0), collecting 0.5 CV fractions until dry. Elution fractions  
189 showing clean protein bands on an SDS-PAGE were then dialyzed and concentrated in Storage buffer  
190 (20% (v/v) glycerol in PBS, pH 7.4) using a 10K MWCO Microsep Advance Centrifugal Device (Pall  
191 Corporation, Port Washington, NY) as directed. Purified protein extracts were aliquoted and stored at  
192 -20 °C, replacing lysate in subsequent characterization and activity assays. Protein concentration was  
193 measured by Bradford method using bovine serum albumin (BSA) as the standard.

## 194 **AvPAL library creation**

195 Random mutagenesis libraries were created using two rounds of error prone PCR, with the  
196 amplicon of the first reaction serving as the template DNA for the second. Each reaction contained  
197 1X Standard *Taq* reaction buffer (New England Biolabs, Inc.), 5 mM MgCl<sub>2</sub>, 0.15 mM MnCl<sub>2</sub>, 0.2 mM  
198 dATP, 0.2 mM dGTP, 1 mM dCTP, 1 mM dTTP, 0.4 μM each primer, 0.4 ng/μl template DNA, and  
199 0.05 U/ml *Taq* DNA polymerase. The reactions were amplified using the following PCR cycle  
200 conditions: 95 °C denaturation, 1 min; 16 cycles of 95 °C denaturation, 30 s; 46 °C annealing, 45 s;  
201 and 68 °C extension, 2 min, followed by 68 °C extension for 5 min. The target vector, pBAV1k was  
202 amplified separately using *Phusion* PCR, and the two were combined using Gibson assembly. The  
203 reaction was purified with a E.Z.N.A. Cycle Pure Kit (Omega) before being transformed by  
204 electroporation into *E. coli* MG1655<sup>rph+</sup>.

## 205 **Optimization of growth-coupled enrichment**

206 Growth was measured by seeding cultures at OD<sub>600</sub> 0.05 and monitoring cell density over time.  
207 Initial experiments used a base nitrogen-deficient minimal media (MM<sup>N-</sup>) (33.7 mM Na<sub>2</sub>HPO<sub>4</sub>, 22 mM  
208 KH<sub>2</sub>PO<sub>4</sub>, 8.55 mM NaCl, 1 mM MgSO<sub>4</sub>, 0.1 mM CaCl<sub>2</sub>, 10 μM FeSO<sub>4</sub>, 0.4% (v/v) glycerol, 10 μg/mL  
209 thiamine, 20 μM IPTG, 12.5 μg/mL chloramphenicol, pH 7.4) that was supplemented with 9.35 mM  
210 phe (MM<sup>phe,init</sup>) or 9.35 mM NH<sub>4</sub>Cl (MM<sup>full,init</sup>). Variable conditions were changed across the parameters  
211 outlined in Figure 2, as well as moving to a more favorable strain for growth in minimal media. This



212 resulted in a final MM<sup>N-,opt</sup> (137 mM NaCl, 2.7 mM KCl, 10 mM Na<sub>2</sub>HPO<sub>4</sub>, 2 mM KH<sub>2</sub>PO<sub>4</sub>, 2 mM MgSO<sub>4</sub>,  
213 1x Trace Metals (Teknova, Inc.), 0.2% (v/v) glucose, 10 µg/mL thiamine, 12.5 µg/mL chloramphenicol,  
214 pH 7.4) supplemented with 30mM phe (MM<sup>phe,opt</sup>) or 9.35 mM NH<sub>4</sub>Cl (MM<sup>full,opt</sup>). To enrich the active  
215 population of the AvPAL\* library, cells were subcultured into fresh MM<sup>phe,opt</sup> once they reached OD<sub>600</sub>  
216 0.2. Remaining cells in each round were minipreped as a pooled plasmid library for further analysis.

## 217 **Flow cytometry**

218 Plasmids, both with a pBAV1k backbone, expressing sfGFP or AvPAL\* were mixed in a 1000:1 or  
219 10:1 ratio as a mock mutant library and transformed by electroporation into *E. coli* MG1655<sup>rph+</sup>. Cells  
220 were recovered for 1 h before being washed and seeded in 5 mL of selective media as prepared  
221 above. Cell density was measured over time until reaching OD<sub>600</sub> 0.2, when the cells were subcultured  
222 to OD<sub>600</sub> 0.05 for the next round of enrichment. Cells were also plated at each subculture for PCR  
223 amplification to confirm the presence of either sfGFP or AvPAL\*. Cells at each point of subculture  
224 were also diluted to OD<sub>600</sub> 0.05 for flow cytometry analysis. A minimum of 10,000 events were  
225 collected using a blue laser on an Attune NxT flow cytometer (Life Technologies, Carlsbad, CA).  
226 Fluorescence of sfGFP was detected on the BL1-H channel with 488nm excitation, and loss of  
227 fluorescence was revealed as a measure of active AvPAL\* enrichment.

## 228 **Enzyme kinetics**

229 AvPAL\* and selected mutants were purified as described above. The activity of 0.1 µg of protein  
230 was measured by the production of tCA over 10 min by recording the absorbance of the reaction  
231 mix at 290nm. Phe was added at varying concentrations from 35µM to 17.5mM in PBS, pH 7.4 (PBS)  
232 at 37°C to begin the reaction. A Michaelis-Menten curve was fit in GraphPad Prism software using  
233 the initial rate at each phe concentration.

## 234 **pH profile**

235 The optimal pH of AvPAL\* and selected mutants was determined by performing the enzyme activity  
236 described above. A 35 mM phe solution was buffered across a pH range (2 to 10) using phosphate-  
237 citrate buffer, prepared by varying concentrations of Na<sub>2</sub>HPO<sub>4</sub> and citric acid. Total 0.2 µg protein  
238 was used to carry out the activity reaction in 200µl at 37°C.

## 239 **Temperature stability**

240 The effect of temperature on the stability of AvPAL\* and selected mutants was determined by  
241 incubating the protein in PBS, pH 7.4 at temperatures ranging from 37°C to 80 °C for 1 hour followed

242 by measuring the enzyme activity. Each enzyme reaction was carried out using 1 µg of PAL protein  
243 and 35mM phe as substrate in a total reaction volume of 200µl at 37 °C.

## 244 **Proteolytic stability**

245 The proteolytic stability was evaluated by subjecting AvPAL\* and selected mutants to a catalytic  
246 amount of trypsin as previously described<sup>36</sup>. Briefly, 100 µg/ml AvPAL enzyme was subjected to  
247 trypsin (40 µg/ml) (MilliporeSigma, Burlington, MA) in PBS at 37 °C. Enzyme activity of 1 µg of protein  
248 was then measured as described above.

## 249 **Acknowledgments**

250 We would like to thank Prof. Nicholas Turner (University of Manchester, UK) for sharing the  
251 AvPAL plasmid. This work was supported by NIH grants DP2HD91798 and R03HD090444.

## 252 **Competing interests**

253 Tufts University and all authors have applied for a patent on this work.

## 254 **References**

- 255 Abell CW, Stith WJ. 1973. An in Vivo Evaluation of the Chemotherapeutic Potency of Phenylalanine  
256 Ammonia-Lyase. *Cancer Research* **33**:2529–2532.
- 257 An J, Zhang M, Lu Q. 2007. Changes in some quality indexes in fresh-cut green asparagus  
258 pretreated with aqueous ozone and subsequent modified atmosphere packaging. *Journal of*  
259 *Food Engineering* **78**:340–344. doi:10.1016/j.jfoodeng.2005.10.001
- 260 Babich OO, Pokrovsky VS, Anisimova NY, Sokolov NN, Prosekov AY. 2013. Recombinant L-  
261 phenylalanine ammonia lyase from *Rhodospiridium toruloides* as a potential anticancer agent.  
262 *Biotechnology and Applied Biochemistry* **60**:316–322. doi:10.1002/bab.1089
- 263 Bartsch S, Wybenga GG, Jansen M, Heberling MM, Wu B, Dijkstra BW, Janssen DB. 2013.  
264 Redesign of a phenylalanine aminomutase into a phenylalanine ammonia lyase.  
265 *ChemCatChem* **5**:1797–1802. doi:10.1002/cctc.201200871
- 266 Bell SM, Wendt DJ, Zhang Y, Taylor TW, Long S, Tsuruda L, Zhao B, Laipis P, Fitzpatrick PA.  
267 2017. Formulation and PEGylation optimization of the therapeutic PEGylated phenylalanine  
268 ammonia lyase for the treatment of phenylketonuria. *PLOS ONE* **12**:e0173269.  
269 doi:10.1371/journal.pone.0173269
- 270 Castañeda MT, Adachi O, Hours RA. 2015. Reduction of L-phenylalanine in protein hydrolysates  
271 using L-phenylalanine ammonia-lyase from *Rhodospiridium toruloides*. *Journal of Industrial*  
272 *Microbiology and Biotechnology* **42**:1299–1307. doi:10.1007/s10295-015-1664-z

- 273 Chang S, Ming T, Bourget L, Lister C. 1995. A new theory of enterorecirculation of amino acids and  
274 its use for depleting unwanted amino acids using oral enzyme-artificial cells, as in removing  
275 phenylalanine in phenylketonuria. *Artificial Cells, Blood Substitutes, and Biotechnology* **23**:1–  
276 21. doi:10.3109/10731199509117665
- 277 Chesters C, Wilding M, Goodall M, Micklefield J. 2012. Thermal bifunctionality of bacterial  
278 phenylalanine aminomutase and ammonia lyase enzymes. *Angewandte Chemie - International*  
279 *Edition* **51**:4344–4348. doi:10.1002/anie.201200669
- 280 Cooke HA, Christianson C v., Bruner SD. 2009. Structure and chemistry of 4-methylideneimidazole-  
281 5-one containing enzymes. *Current Opinion in Chemical Biology* **13**:453–461.  
282 doi:10.1016/j.cbpa.2009.06.013
- 283 D’Cunha GB, Satyanarayan V, Nair PM. 1996. Stabilization of phenylalanine ammonia lyase  
284 containing *Rhodotorula glutinis* cells for the continuous synthesis of L-phenylalanine methyl  
285 ester/96/. *Enzyme and Microbial Technology* **19**:421–427. doi:10.1016/S0141-0229(96)00013-  
286 0
- 287 Durrer KE, Allen MS, von Herbing IH. 2017. Genetically engineered probiotic for the treatment of  
288 phenylketonuria (PKU); Assessment of a novel treatment in vitro and in the PAHenu2 mouse  
289 model of PKU. *PLoS ONE* **12**:1–17. doi:10.1371/journal.pone.0176286
- 290 Flachbart LK, Sokolowsky S, Marienhagen J. 2019. Displaced by Deceivers: Prevention of  
291 Biosensor Cross-Talk Is Pivotal for Successful Biosensor-Based High-Throughput Screening  
292 Campaigns. *ACS Synthetic Biology* **8**:1847–1857. doi:10.1021/acssynbio.9b00149
- 293 Gelfand DH, Steinberg RA. 1977. *Escherichia coli* Mutants Deficient in the Aspartate and Aromatic  
294 Amino Acid Aminotransferases. *Journal of Bacteriology* **130**:429–440.
- 295 Guzmán GI, Utrilla J, Nurk S, Brunk E, Monk JM, Ebrahim A, Palsson BO, Feist AM. 2015. Model-  
296 driven discovery of underground metabolic functions in *Escherichia coli*. *Proceedings of the*  
297 *National Academy of Sciences* **112**:929–934. doi:10.1073/pnas.1414218112
- 298 Hoagland RE. 1996. Chemical Interactions with Bioherbicides to Improve Efficacy. *Weed*  
299 *Technology* **10**:651–674. doi:10.1017/s0890037x00040586
- 300 Hyder T, Coppenrath VA. 2019. A comprehensive review of Pegvaliase, an enzyme substitution  
301 therapy for the treatment of phenylketonuria. *Drug Target Insights* **13**.  
302 doi:10.1177/1177392819857089
- 303 Isabella VM, Ha BN, Castillo MJ, Lubkowitz DJ, Rowe SE, Millet YA, Anderson CL, Li N, Fisher AB,  
304 West KA, Reeder PJ, Momin MM, Bergeron CG, Guilmain SE, Miller PF, Kurtz CB, Falb D.  
305 2018. Development of a synthetic live bacterial therapeutic for the human metabolic disease  
306 phenylketonuria. *Nat Biotechnol* **36**:857–867. doi:10.1038/nbt.4222
- 307 Jensen KAJF. 1993. The *Escherichia coli* K-12 “Wild Types” W3110 and MG1655 Have an rph  
308 Frameshift Mutation That Leads to Pyrimidine Starvation Due to Low pyrE Expression Levels.  
309 *Journal of Bacteriology* **175**:3401–3407.

- 310 Jiang H, Wood K v., Morgan JA. 2005. Metabolic engineering of the phenylpropanoid pathway in  
311 *saccharomyces cerevisiae*. *Applied and Environmental Microbiology* **71**:2962–2969.  
312 doi:10.1128/AEM.71.6.2962-2969.2005
- 313 Kakkis ED, Vellard MC, Muthalif M. 2009. Compositions of prokaryotic phenylalanine ammonia-  
314 lyase and methods of treating cancer using compositions thereof. US007560263B2.
- 315 Kang TS, Wang L, Sarkissian CN, Gámez A, Scriver CR, Stevens RC. 2010. Converting an  
316 injectable protein therapeutic into an oral form: Phenylalanine ammonia lyase for  
317 phenylketonuria. *Molecular Genetics and Metabolism* **99**:4–9.  
318 doi:10.1016/j.ymgme.2009.09.002
- 319 Lee H, Kim BG, Kim M, Ahn JH. 2015. Biosynthesis of two flavones, apigenin and genkwanin, in  
320 *Escherichia coli*. *Journal of Microbiology and Biotechnology* **25**:1442–1448.  
321 doi:10.4014/jmb.1503.03011
- 322 Louie G v., Bowman ME, Moffitt MCC, Baiga TJ, Moore BSS, Noel JP. 2006. Structural  
323 Determinants and Modulation of Substrate Specificity in Phenylalanine-Tyrosine Ammonia-  
324 Lyases. *Chemistry and Biology* **13**:1327–1338. doi:10.1016/j.chembiol.2006.11.011
- 325 Lovelock SL, Turner NJ. 2014. Bacterial *Anabaena variabilis* phenylalanine ammonia lyase: A  
326 biocatalyst with broad substrate specificity. *Bioorganic and Medicinal Chemistry* **22**:5555–5557.  
327 doi:10.1016/j.bmc.2014.06.035
- 328 McKenna R, Nielsen DR. 2011. Styrene biosynthesis from glucose by engineered *E. coli*. *Food,*  
329 *Pharmaceutical and Bioengineering Division - Core Programming Topic at the 2011 AIChE*  
330 *Annual Meeting* **1**:340–350. doi:10.1016/j.ymben.2011.06.005
- 331 Park N il, Xu H, Li X, Kim YS, Lee MY, Park SU. 2012. Overexpression of phenylalanine ammonia-  
332 lyase improves flavones production in transgenic hairy root cultures of *Scutellaria baicalensis*.  
333 *Process Biochemistry* **47**:2575–2580. doi:10.1016/j.procbio.2012.09.026
- 334 Reitzer LJ. 1996. Sources of nitrogen and their utilization In: Neidhardt FC, editor. *Escherichia Coli*  
335 *and Salmonella: Cellular and Molecular Biology*. Washington, D.C.: American Society for  
336 Microbiology. pp. 380–390.
- 337 Rossi L, Pierigè F, Carducci C, Gabucci C, Pascucci T, Canonico B, Bell SM, Fitzpatrick PA, Leuzzi  
338 V, Magnani M. 2014. Erythrocyte-mediated delivery of phenylalanine ammonia lyase for the  
339 treatment of phenylketonuria in BTBR-Pahenu2mice. *Journal of Controlled Release* **194**:37–  
340 44. doi:10.1016/j.jconrel.2014.08.012
- 341 Sarkissian CN, Gámez A, Wang L, Charbonneau M, Fitzpatrick P, Lemontt JF, Zhao B, Vellard M,  
342 Bell SM, Henschell C, Lambert A, Tsuruda L, Stevens RC, Scriver CR. 2008. Preclinical  
343 evaluation of multiple species of PEGylated recombinant phenylalanine ammonia lyase for the  
344 treatment of phenylketonuria. *Proceedings of the National Academy of Sciences of the United*  
345 *States of America* **105**:20894–20899. doi:10.1073/pnas.0808421105
- 346 Shen R, Fritz RR, Abell CW. 1977. Clearance of phenylalanine ammonia-lyase from normal and  
347 tumor-bearing mice. *Cancer Research* **37**:1051–1056.

- 348 Shetty K, Crawford DL, Pometto AL. 1986. Production of L-phenylalanine from starch by analog-  
349 resistant mutants of *Bacillus polymyxa*. *Applied and Environmental Microbiology* **52**:637–643.
- 350 Shin SY, Jung SM, Kim MD, Han NS, Seo JH. 2012. Production of resveratrol from tyrosine in  
351 metabolically engineered *Saccharomyces cerevisiae*. *Enzyme and Microbial Technology*  
352 **51**:211–216. doi:10.1016/j.enzmictec.2012.06.005
- 353 Turner NJ. 2011. Ammonia lyases and aminomutases as biocatalysts for the synthesis of  $\alpha$ -amino  
354 and  $\beta$ -amino acids. *Current Opinion in Chemical Biology* **15**:234–240.  
355 doi:10.1016/j.cbpa.2010.11.009
- 356 Verhoef S, Ruijsenaars HJ, de Bont JAM, Wery J. 2007. Bioproduction of p-hydroxybenzoate from  
357 renewable feedstock by solvent-tolerant *Pseudomonas putida* S12. *Journal of Biotechnology*  
358 **132**:49–56. doi:10.1016/j.jbiotec.2007.08.031
- 359 Verhoef S, Wierckx N, Westerhof RGM, de Winde JH, Ruijsenaars HJ. 2009. Bioproduction of p-  
360 hydroxystyrene from glucose by the solvent-tolerant bacterium *Pseudomonas putida* S12 in a  
361 two-phase water-decanol fermentation. *Applied and Environmental Microbiology* **75**:931–936.  
362 doi:10.1128/AEM.02186-08
- 363 Walker KD, Klettke K, Akiyama T, Croteau R. 2004. Cloning, heterologous expression, and  
364 characterization of a phenylalanine aminomutase involved in taxol biosynthesis. *Journal of*  
365 *Biological Chemistry* **279**:53947–53954. doi:10.1074/jbc.M411215200
- 366 Wang L, Gamez A, Archer H, Abola EE, Sarkissian CN, Fitzpatrick P, Wendt D, Zhang Y, Vellard M,  
367 Bliesath J, Bell SM, Lemontt JF, Scriver CR, Stevens RC. 2008. Structural and Biochemical  
368 Characterization of the Therapeutic *Anabaena variabilis* Phenylalanine Ammonia Lyase.  
369 *Journal of Molecular Biology* **380**:623–635. doi:10.1016/j.jmb.2008.05.025
- 370 Wohlgemuth R. 2010. Asymmetric biocatalysis with microbial enzymes and cells. *Current Opinion in*  
371 *Microbiology* **13**:283–292. doi:10.1016/j.mib.2010.04.001
- 372 Wrenbeck EE, Azouz LR, Whitehead TA. 2017. Single-mutation fitness landscapes for an enzyme  
373 on multiple substrates reveal specificity is globally encoded. *Nature Communications* **8**:1–10.  
374 doi:10.1038/ncomms15695
- 375 Wu B, Szymanski W, Wietzes P, de Wildeman S, Poelarends GJ, Feringa BL, Janssen DB. 2009.  
376 Enzymatic synthesis of enantiopure  $\alpha$ - and  $\beta$ -amino acids by phenylalanine aminomutase-  
377 catalysed amination of cinnamic acid derivatives. *ChemBioChem* **10**:338–344.  
378 doi:10.1002/cbic.200800568
- 379 Wu J, Du G, Zhou J, Chen J. 2013. Metabolic engineering of *Escherichia coli* for (2S)-pinocembrin  
380 production from glucose by a modular metabolic strategy. *Metabolic Engineering* **16**:48–55.  
381 doi:10.1016/j.ymben.2012.11.009
- 382 Xiang L, Moore BS. 2005. Biochemical characterization of a prokaryotic phenylalanine ammonia  
383 lyase. *Journal of Bacteriology* **187**:4286–4289. doi:10.1128/JB.187.12.4286-4289.2005
- 384 Yamada S, Nabe K, Izuo N. 1981. Production of L-phenylalanine from trans-cinnamic acid with  
385 *Rhodotorula glutinis* containing L-phenylalanine ammonia-lyase activity. *Applied and*  
386 *Environmental Microbiology* **42**:773–778.

- 387 Yang J, Tao R, Wang L, Song L, Wang Y, Gong C, Yao S, Wu Q. 2019. Thermosensitive Micelles  
388 Encapsulating Phenylalanine Ammonia Lyase Act as a Sustained and Efficacious Therapy  
389 Against Colorectal Cancer. *Journal of Biomedical Nanotechnology*.
- 390 Zhang F, Huang N, Zhou L, Cui W, Liu Z, Zhu L, Liu Y, Zhou Z. 2017. Modulating the pH Activity  
391 Profiles of Phenylalanine Ammonia Lyase from *Anabaena variabilis* by Modification of Center-  
392 Near Surface Residues. *Applied Biochemistry and Biotechnology* **183**:699–711.  
393 doi:10.1007/s12010-017-2458-8
- 394
